# Supplementary material for: Mitochondrial dysfunction promotes microbial composition that negatively impacts on ulcerative colitis development and progression
Source: PubMed Central journal article supplement (PMC10560208; doi:10.1038/s41522-023-00443-y), 2023-10-07
Supplement: 41522_2023_443_MOESM1_ESM.pdf [file 41522_2023_443_MOESM1_ESM.pdf]

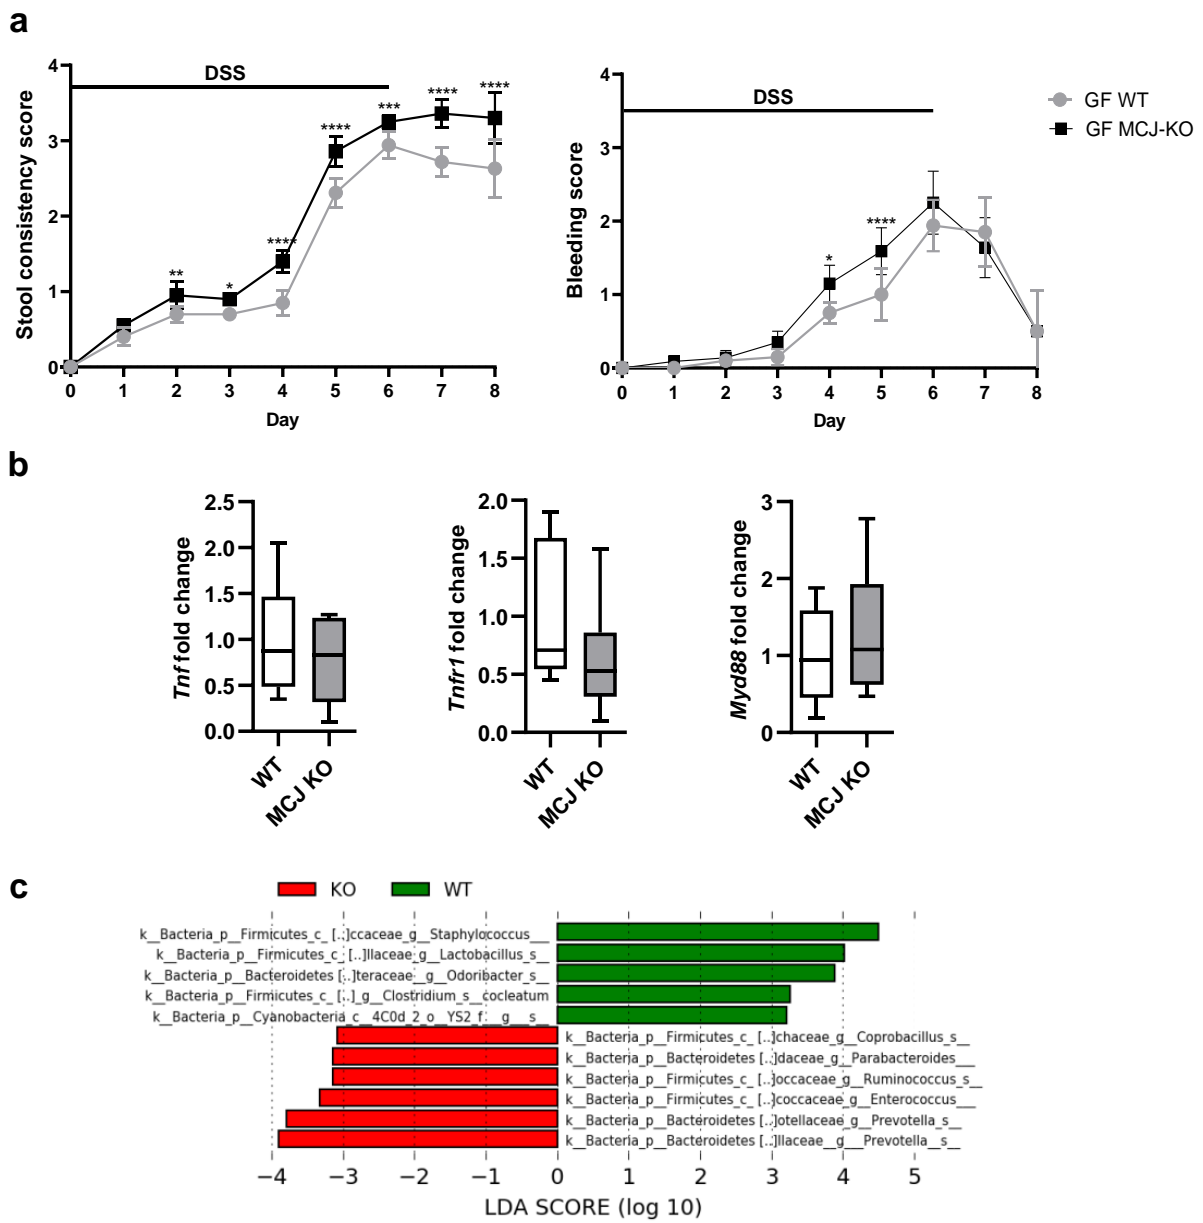

**Supplementary Figure 1. Complementary results from the GF mice experiment.** **a** Stool consistency and bleeding score during the experimental period; data are means  $\pm$  SEM and for statistical analysis, two-way ANOVA was used. **b** Gene expression level of *Tnf*, *Tnfr1* and *Myd88* in colon tissue in a GF colitis model. Data is represented as box and whisker plots of median, quartiles and range with at least 8 mice per group and analyzed using Mann-Whitney U test. **c** Histogram of linear discriminant analysis (LDA) effect size (LEfSe) representing statistically differential abundance between GF mice colonized with WT (shown in green) and MCJ-deficient mice (shown in red) microbial communities after colitis induction.

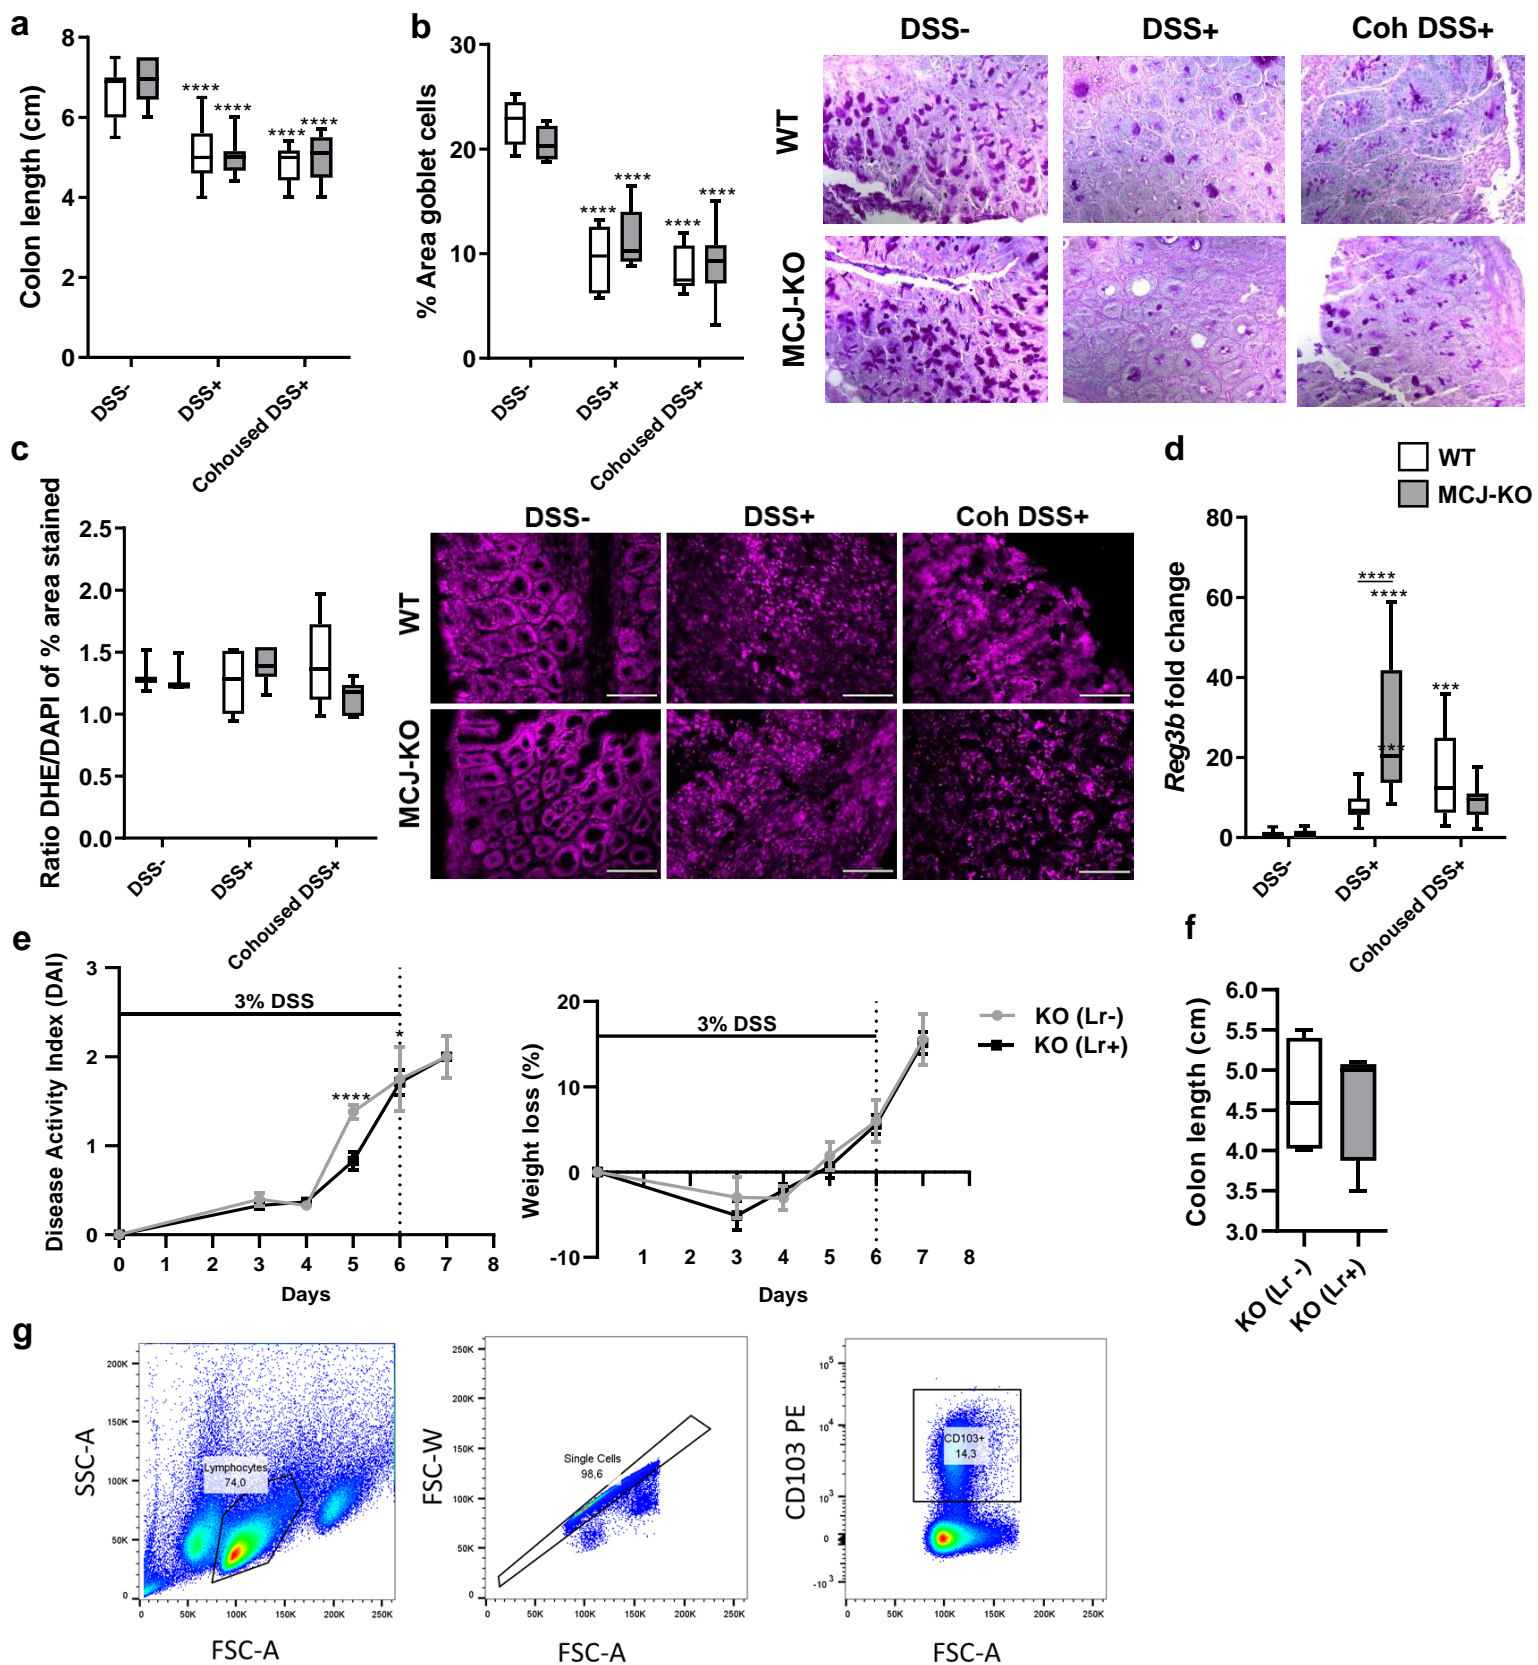

**Supplementary Figure 2. Additional data of the cohousing experiment.** **a** Colonic length (cm). **b** Goblet cells: % of positive cells stained with PAS (Periodic Acid-Schiff) and representative images of the staining. **c** Reactive oxygen species (ROS) measured by dihydroethidium (DHE) staining in colon sections. Scale bar, 100µm. **d** Gene expression level of *Reg3b* in colon tissue in a DSS-induced colitis model. **a-d** White boxplots indicate WT and grey boxplots MCJ-KO mice. Data are represented as box and whisker plots of median, quartiles and range with at least 8 mice per group (in DSS-treated groups). Data were analyzed using two-way ANOVA, where an asterisk “\*” upside the box shows significant differences versus the control (DSS-). Significant differences within the same genotype between DSS-treated housed alone and cohoused groups are represented with an asterisk (\*) inside the box of WT and MCJ-deficient mice that were housed alone (DSS+). Differences between genotypes in the same experimental group are presented as a line with an asterisk (\*). **e, f** Oral administration of *Lactobacillus reuteri* in MCJ-deficient mice during DSS-induced colitis. **e** Disease activity index (DAI) and weight loss percentage expressed as means ± SEM. **f** Colonic length (cm). **e, f** Grey lines and white boxplots indicate MCJ-deficient mice without *L. reuteri* administration, and black lines and grey boxplots MCJ-deficient mice *L. reuteri* orally administrated. For statistical analysis, two-way ANOVA and the non-parametric Mann-Whitney t-test were used. **g** Gating strategy to compare CD103+ cells from the mesenteric lymph nodes of all experimental groups.

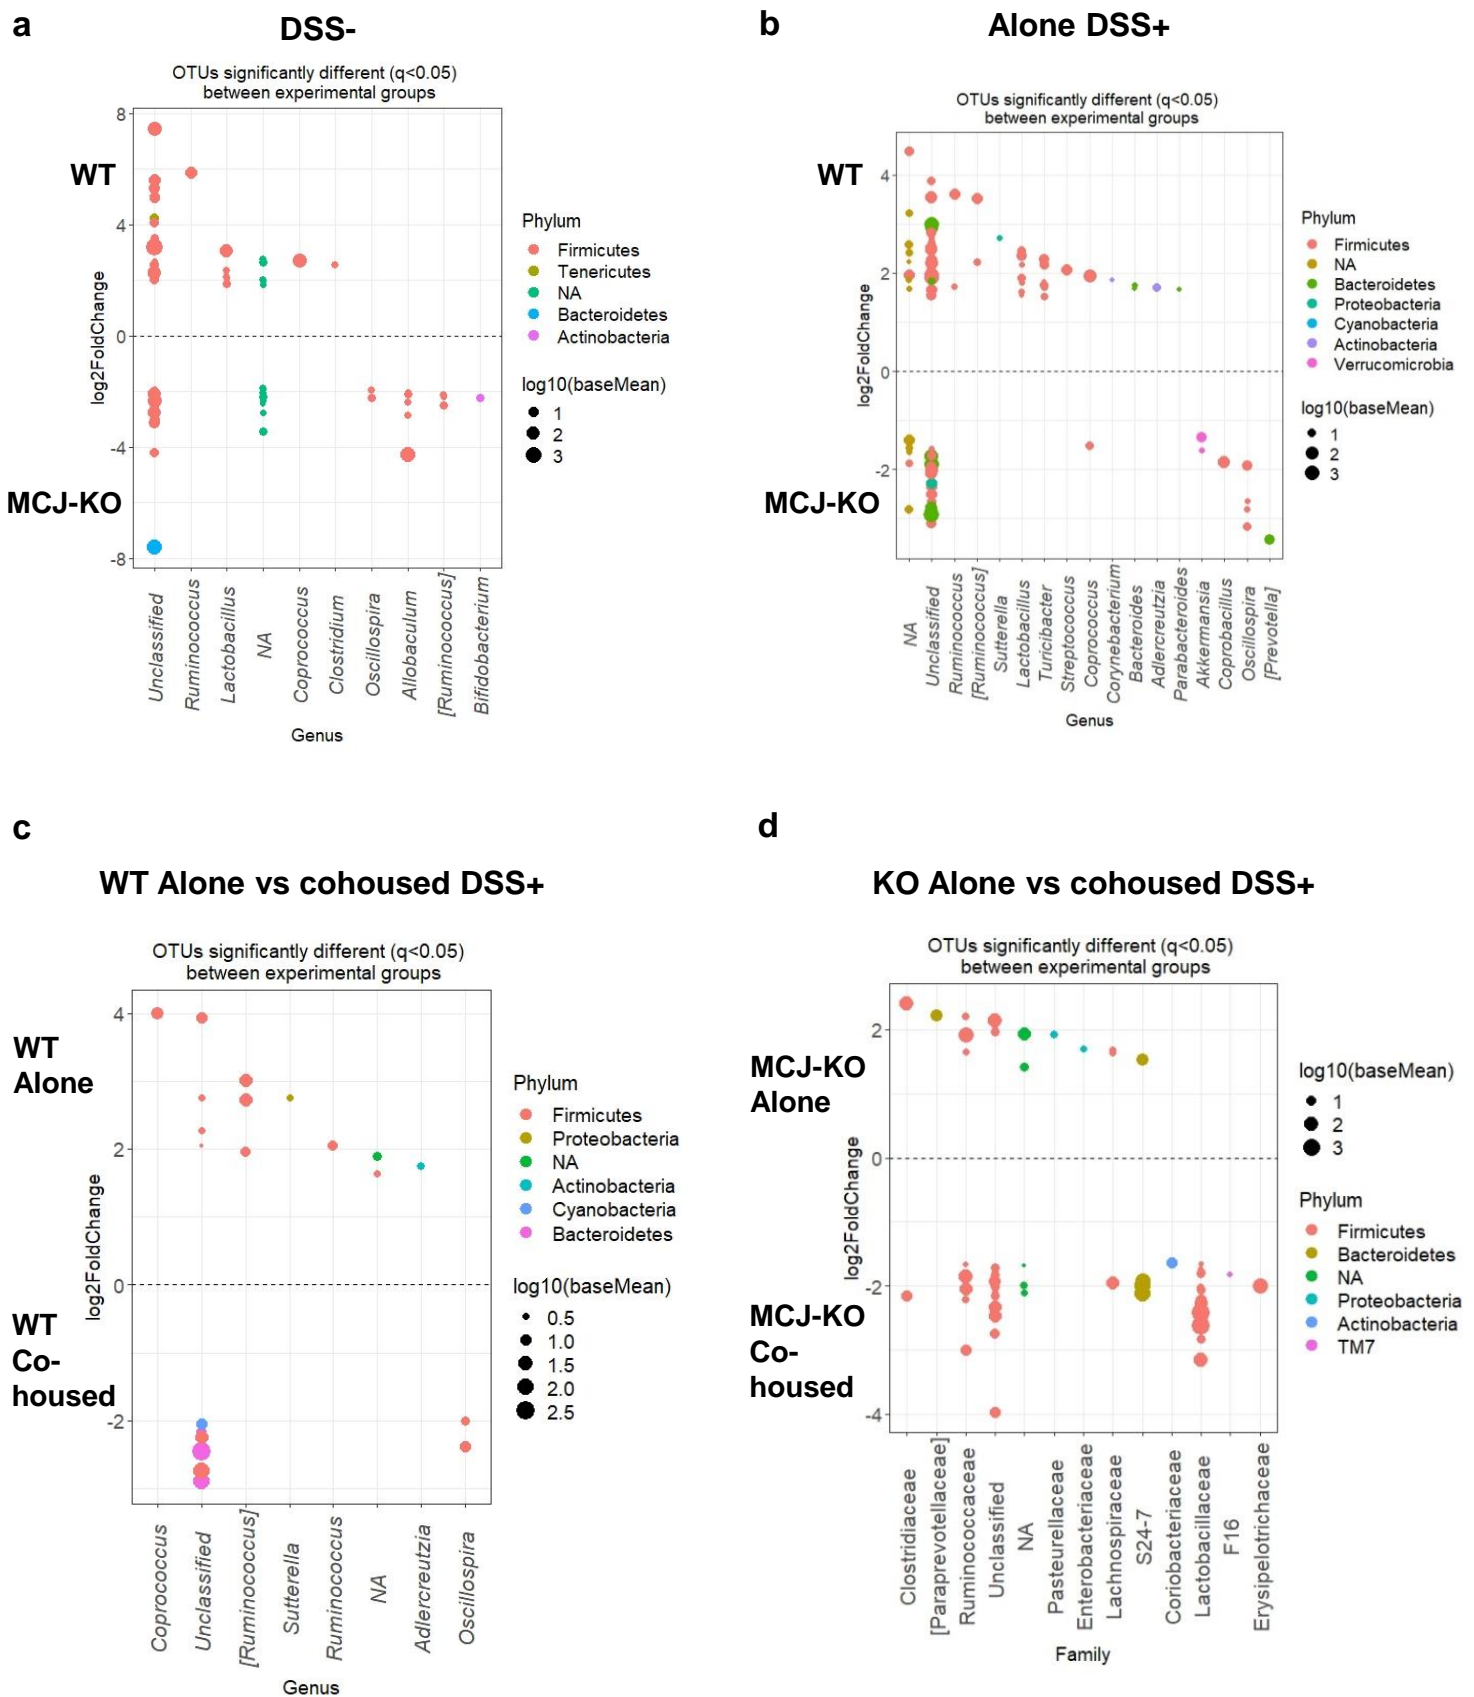

**Supplementary Figure 3. Composition of host microbiome at the genus level.** Differential representation of OTUs (adjusted  $P < 0.05$ , DESeq2) at genus level between **a** healthy (WT vs MCJ KO) housed alone without DSS treatment (DSSn), **b** housed alone (A) DSS positive (p) (WT vs MCJ KO) and **c** WT housed alone vs WT cohoused (Co) DSS p (WT\_Ap vs WT\_Cop). **d** Differential abundance of OTUs at family level between MCJ-deficient housed alone and cohoused.

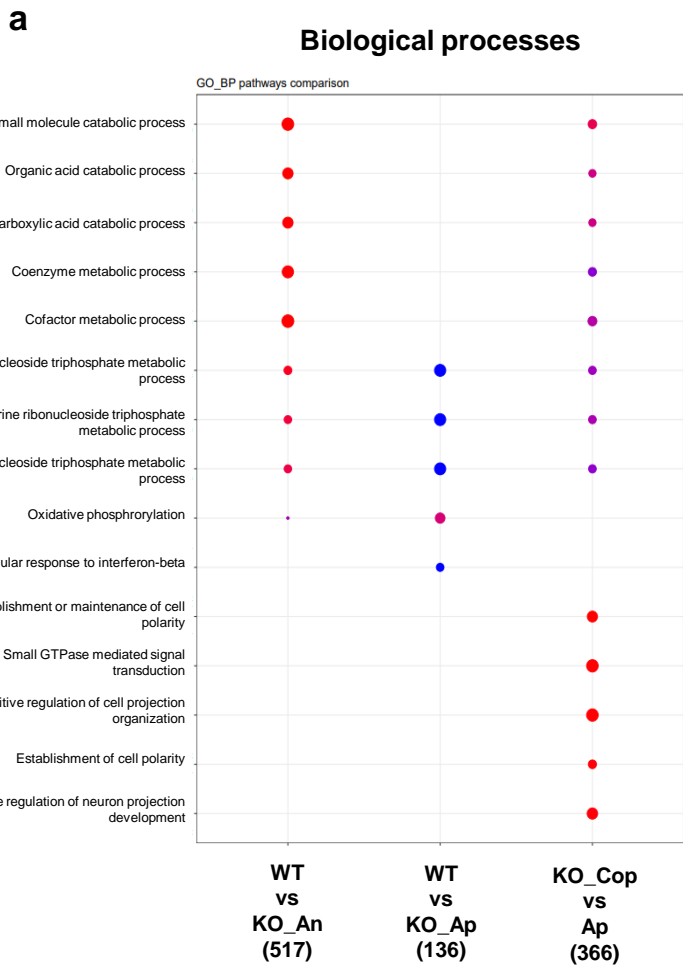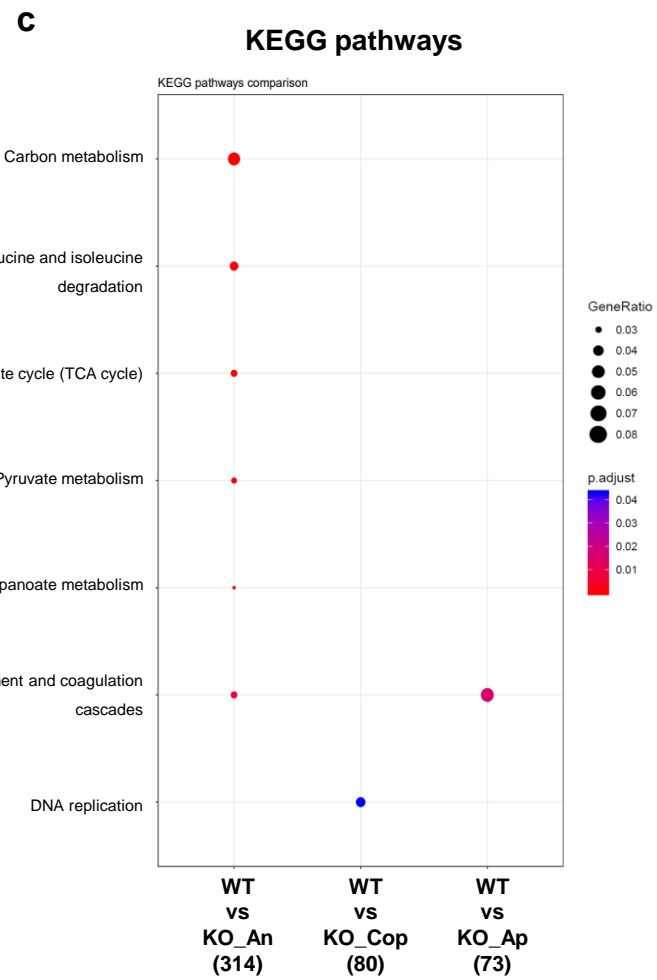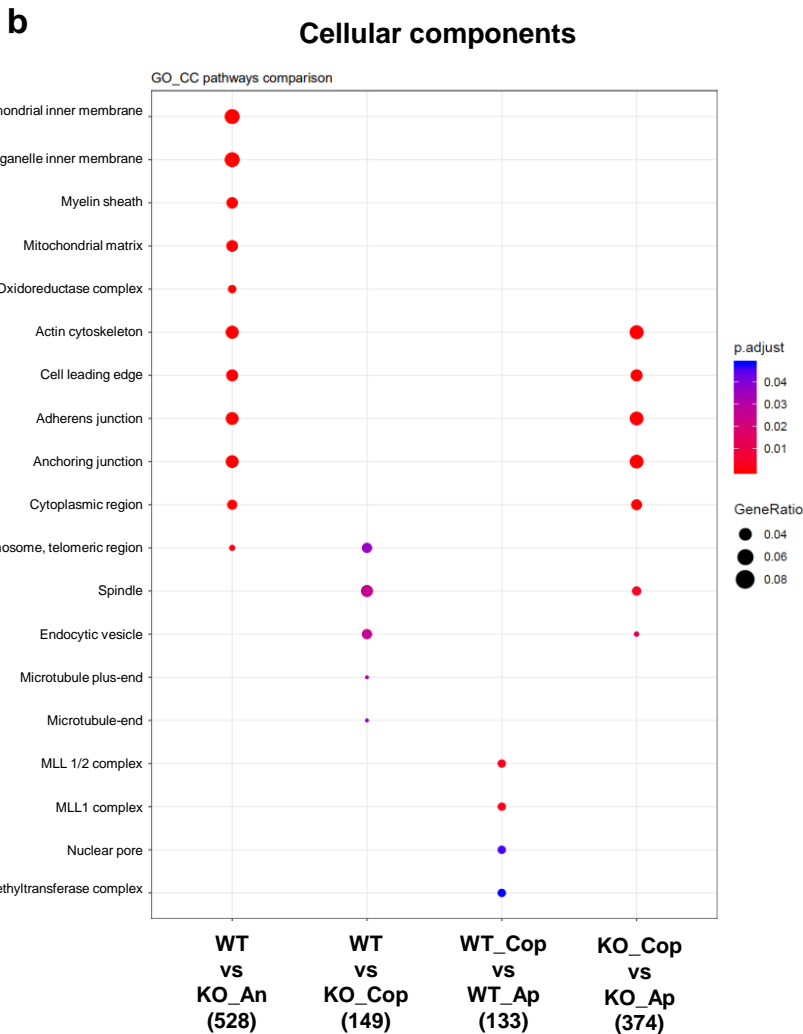

**Supplementary Figure 4. The impact of cohousing on the host proteome.** Dot plot shows up-regulated proteins associated with the GO terms (FDR <0.05) of **a** biological processes (BP), **b** cellular components (CC) and **c** KEGG pathways identified under the different comparisons. Dot size reflects gene count enrichment, and dot color displays pathway enrichment significance (adjusted P), being red color the most significant. A= housed alone; Co=cohoused; n=DSS negative; p=DSS positive.

| Gene              | Forward primer sequence<br>Reverse primer sequence                                                                                    | Ta<br>(°C) |
|-------------------|---------------------------------------------------------------------------------------------------------------------------------------|------------|
| <i>Il1b</i>       | 5'-ACACTCCTTAGTCCTCGGCCA-3'<br>5'-CCATCAGAGGCAAGGAGGAA-3'                                                                             | 60         |
| <i>Lcn2</i>       | 5'-CAATGTCACCTCCATCCTGGT-3'<br>5'-ACTGGTTGTAGTCCGTGGTG-3'                                                                             | 60         |
| <i>Myd88</i>      | 5'-CCGCCTATCGCTGTTCTTGA-3'<br>5'-GCCAGGCATCCAACAAACTG-3'                                                                              | 59         |
| <i>Reg3b</i>      | 5'-TACTGCCTTAGACCGTGCTTTCTG-3'<br>5'-GACATAGGGCAACTTCACCTCACA-3'                                                                      | 60         |
| <i>Rpl19</i>      | 5'-GACCAAGGAAGCACGAAAGC-3'<br>5'-CAGGCCGCTATGTACAGACA-3'                                                                              | 60         |
| <i>Tnf</i>        | 5'-AGCCCACGTCGTAGCAAACCAC-3'<br>5'-ATCGGCTGGCACCAGTGGT-3'                                                                             | 60         |
| <i>Tnfr1</i>      | 5'-GCTGTTGCCCTGGTTATCT-3'<br>5'-ATGGAGTAGACTTCGGGCCT-3'                                                                               | 60         |
| <b>Conditions</b> | Hold cycle 95°C for 2.30', and then 40x (95°C for 15", 60°C for 1')                                                                   |            |
| <b>Reagents</b>   | PerfeCTa SYBR® Green SuperMix (Quantabio)                                                                                             |            |
| <b>Instrument</b> | QuantStudio 6 Flex Real-Time PCR System                                                                                               |            |
| <b>Expression</b> | Normalized to <i>Rpl19</i> housekeeping gene using the Pfaffl equation and expressed relative to the mean of a relevant control group |            |

**Supplementary table 1.** Forward and reverse primer sequences (5' to 3') and annealing temperature (Ta) of the mouse primers used for murine qPCR analysis.
